# Supplementary material
Source: PubMed Central journal article supplement (PMC7504952)
Supplement: IAI.00204-20-s0001.pdf [file IAI.00204-20-s0001.pdf]

Table S1. Histologic scoring criteria for evaluating inflammation of the placenta.

| <b>Placenta</b>               | <b>Score</b> | <b>Description</b>                           |
|-------------------------------|--------------|----------------------------------------------|
| <b>Edema</b>                  | 0            | Not present                                  |
|                               | 1            | Present                                      |
| <b>Mononuclear infiltrate</b> | 0            | Not present                                  |
|                               | 1            | Minimal—One focus per 5 10x objective        |
|                               | 2            | Mild—Two to four foci per 5 10x objective    |
|                               | 3            | Moderate—Five to 10 foci per 5 10x objective |
|                               | 4            | Marked—>8 per 5 10x objective                |
| <b>Fibrosis</b>               | 0            | Not present                                  |
|                               | 1            | Minimal—One focus per 5 10x objective        |
|                               | 2            | Mild—Two to four foci per 5 10x objective    |
|                               | 3            | Moderate—Five to 7 foci per 5 10x objective  |
|                               | 4            | Marked—>8 per 4x objective                   |
| <b>Necrosis</b>               | 0            | Not present                                  |
|                               | 1            | Minimal—one focus per 5 10x objective        |
|                               | 2            | Mild—Two to four foci per 5 10x objective    |
|                               | 3            | Moderate—Five to 7 foci per 5 10x objective  |
|                               | 4            | Marked— >8 foci per 5 10x objective          |
| <b>Bacteria</b>               | 0            | Not present                                  |
|                               | 1            | Present                                      |
