# Supplementary material
Source: PubMed Central journal article supplement (PMC7504952)
Supplement: IAI.00204-20-s0002.pdf [file IAI.00204-20-s0002.pdf]

| <i>Group/<br/>Animal</i> | <i>C-R<br/>length<br/>(cm)</i> | <i>Estimated<br/>stage of<br/>gestation</i> | <i>Stillborn<br/>(y/n)</i> | <i>Spleen<br/>(log<sub>10</sub>/g)</i> | <i>Liver<br/>(log<sub>10</sub>/g)</i> | <i>Lung<br/>(log<sub>10</sub>/g)</i> | <i>Stomach<br/>contents<br/>(+/-)</i> |
|--------------------------|--------------------------------|---------------------------------------------|----------------------------|----------------------------------------|---------------------------------------|--------------------------------------|---------------------------------------|
|--------------------------|--------------------------------|---------------------------------------------|----------------------------|----------------------------------------|---------------------------------------|--------------------------------------|---------------------------------------|

***B.  
melitensis***  
***16MΔvjbR***  
**+ *QuilA***

|      |      |    |   |   |   |   |   |
|------|------|----|---|---|---|---|---|
| A F1 | 10   | 62 | n | 0 | 0 | 0 | - |
| F2   | 10.5 | 62 | n | 0 | 0 | 0 | - |
| B F1 | 10.5 | 62 | n | 0 | 0 | 0 | - |
| C F1 | 11.5 | 65 | n | 0 | 0 | 0 | - |
| F2   | 11   | 65 | n | 0 | 0 | 0 | - |
| F3   | 10.5 | 62 | n | 0 | 0 | 0 | - |
| D F1 | 11   | 65 | n | 0 | 0 | 0 | - |
| F2   | 10.5 | 62 | n | 0 | 0 | 0 | - |
| F3   | 10   | 62 | n | 0 | 0 | 0 | - |
| E F1 | 11   | 65 | n | 0 | 0 | 0 | - |
| F2   | 10.5 | 62 | n | 0 | 0 | 0 | - |
| F F1 | 11   | 65 | n | 0 | 0 | 0 | - |
| F2   | 11   | 65 | n | 0 | 0 | 0 | - |
| G F1 | 9    | 53 | n | 0 | 0 | 0 | - |
| F2   | 9.2  | 53 | n | 0 | 0 | 0 | - |
| F3   | 9    | 53 | n | 0 | 0 | 0 | - |
| F4   | 9    | 53 | n | 0 | 0 | 0 | - |

***B. abortus***  
**S19**

|      |      |    |   |   |   |   |   |
|------|------|----|---|---|---|---|---|
| A F1 | 11   | 65 | n | 0 | 0 | 0 | - |
| B F1 | 9.5  | 60 | n | 0 | 0 | 0 | - |
| F2   | 10   | 62 | n | 0 | 0 | 0 | - |
| F3   | 10   | 62 | n | 0 | 0 | 0 | - |
| C F1 | 10   | 62 | n | 0 | 0 | 0 | - |
| F2   | 10   | 62 | n | 0 | 0 | 0 | - |
| F3   | 10   | 62 | n | 0 | 0 | 0 | - |
| F4   | 10   | 62 | n | 0 | 0 | 0 | - |
| D F1 | 11   | 65 | n | 0 | 0 | 0 | - |
| F2   | 11   | 65 | n | 0 | 0 | 0 | - |
| F3   | 11   | 65 | n | 0 | 0 | 0 | - |
| E F1 | 10.5 | 62 | n | 0 | 0 | 0 | - |
| F2   | 9.8  | 62 | n | 0 | 0 | 0 | - |
| F F1 | 10.5 | 62 | n | 0 | 0 | 0 | - |

|               |      |    |   |      |      |      |   |
|---------------|------|----|---|------|------|------|---|
| F2            | 10   | 62 | n | 0    | 0    | 0    | - |
| F3            | 10.5 | 62 | n | 0    | 0    | 0    | - |
| G F1          | 11   | 65 | n | 0    | 0    | 0    | - |
| <b>PBS+</b>   |      |    |   |      |      |      |   |
| <b>Quil-A</b> |      |    |   |      |      |      |   |
| A F1          | 10.5 | 62 | n | 0    | 0    | 0    | - |
| F2            | 10   | 62 | n | 0    | 0    | 0    | - |
| F3            | 10.5 | 62 | n | 0    | 0    | 0    | - |
| B F1          | 10   | 64 | n | 0    | 0    | 0    | - |
| F2            | 10   | 64 | n | 0    | 0    | 0    | - |
| F3            | 10   | 64 | y | 0    | 0    | 0    | - |
| C F1          | 10   | 64 | n | 2.35 | 0    | 0    | + |
| F2            | 10.5 | 64 | n | 4.82 | 2.50 | 4.92 | - |
| F3            | 9    | 53 | y | 0    | 0    | 3.06 | - |
| F4            | 9    | 53 | y | 2.04 | 0    | 0    | + |
| F5            | 9    | 64 | y | 0    | 0    | 2.35 | + |
| D F1          | 9.7  | 64 | n | 0    | 0    | 0    | - |
| F2            | 10   | 64 | n | 0    | 0    | 0    | - |
| F3            | 10.3 | 64 | n | 0    | 0    | 0    | - |
| E F1          | 8    | 51 | y | 1.89 | 0    | 1.74 | + |
| F2            | 8    | 51 | y | 2.25 | 0    | 1.24 | - |

**Table S2.** Crown to rump length, estimated stage of gestation, fetal viability, and colonization of fetuses from vaccinated pregnant guinea pigs challenged with  $1 \times 10^7$  CFU *B. melitensis* IT. C-R length was measured from the base of the skull to the point of the hip in cm and compared to established values for C-R length in fetal guinea pigs. Fetal viability reported as stillborn: yes (y) or no (n). Fetal spleen, liver, lung, and stomach contents were cultured on Farrell's media and results are reported as  $\log_{10}/g$ . Results of culture of stomach contents reported as growth (+) or no growth (-).
