# Supplementary material
Source: PubMed Central journal article supplement (PMC7504952)
Supplement: IAI.00204-20-s0005.pdf [file IAI.00204-20-s0005.pdf]

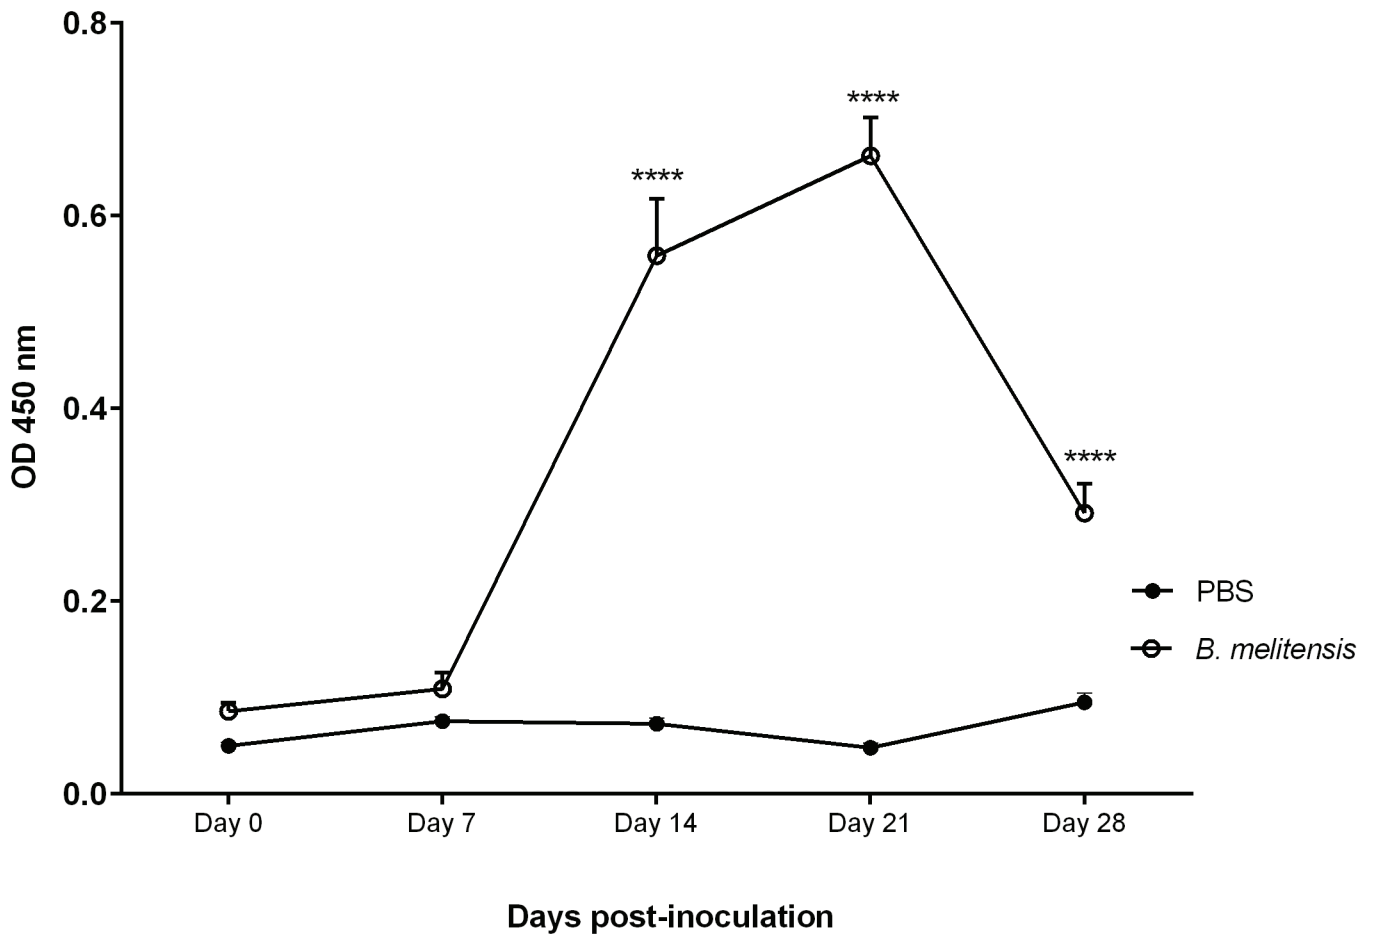

**Figure S3. IT inoculation results in a *Brucella*-specific IgG response to infection.** Guinea pigs at mid-gestation (n=4) were challenged with  $1 \times 10^7$  CFU *B. melitensis* IT or sterile PBS and were euthanized at 7-day intervals for 28-days. Blood was obtained from the lateral saphenous at days 0 and 14 or from cardiac blood at study end-points and was analyzed for *Brucella*-specific IgG via iELISA. Data are represented as the mean per group per time point. Statistical significance was determined by one-way ANOVA followed by Dunnett's multiple comparisons.
