# Supplementary material
Source: PubMed Central journal article supplement (PMC7504952)
Supplement: IAI.00204-20-s0006.pdf [file IAI.00204-20-s0006.pdf]

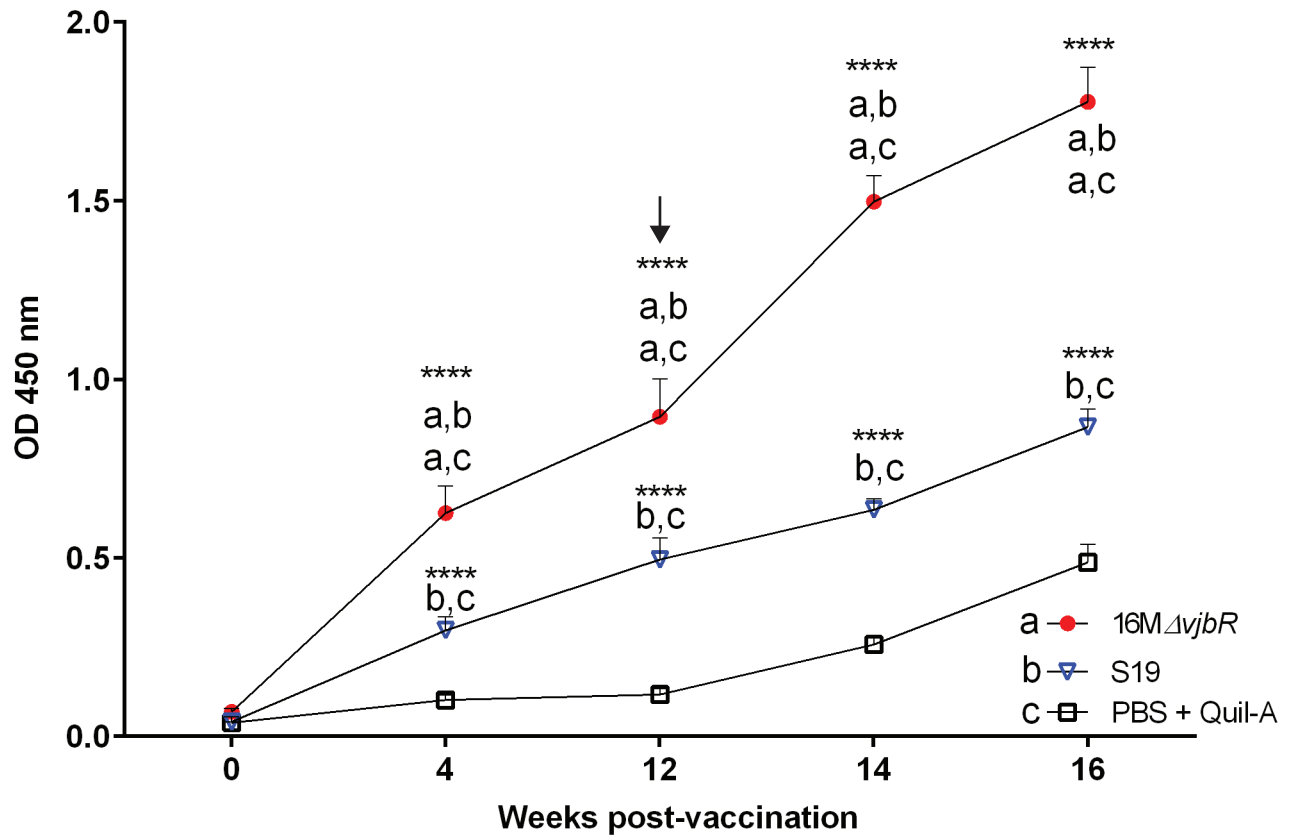

**Figure S4. Vaccination promotes a robust *Brucella*-specific IgG response.** Blood samples were obtained from the lateral saphenous vein at 0,4-,12-,14-, and 16-weeks post-vaccination. At mid-gestation and 12-weeks post-vaccination, pregnant guinea pigs were challenged (arrow) with  $1 \times 10^7$  CFU *B. melitensis* IT. iELISA was used to evaluate the IgG response to vaccination. Statistical significance was determined by ANOVA followed by Tukey's multiple comparisons. a- 16M $\Delta$ vjbR; b- S19; c- PBS+ Quil-A. \*\*\*\*,  $P < 0.0001$ .
